# Supplementary material
Source: PubMed Central journal article supplement (PMC3096687)

**Figure S4.** LTQ batch analysis. Scatter plot of Pearson correlation between transformed spectral counts of all proteins within pairs of samples. The range of correlations is shown for technical replicates (purple), sample pairs within a batch (orange), and sample pairs in different batches (blue). The correlations are broken down by disease group (N: non-cancer, T: tumor-bearing). The numbers at the bottom of the plot provide the number of pairs within each class.

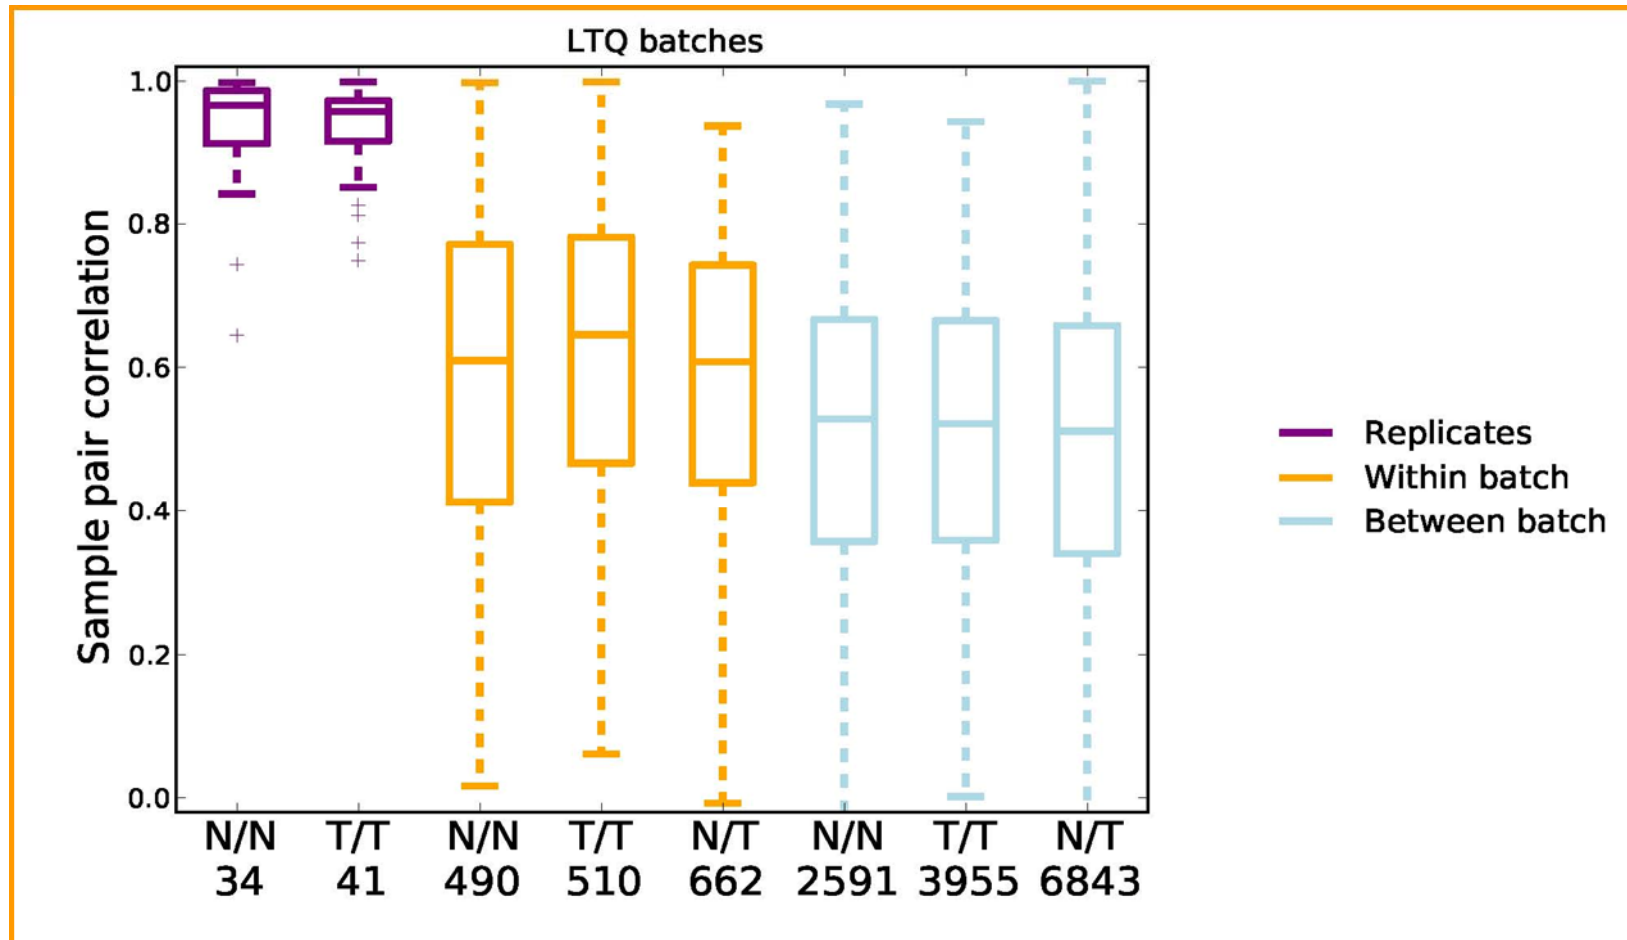

Supplement: NIHMS285254-supplement-4.pdf [file NIHMS285254-supplement-4.pdf]
