# Supplementary material
Source: PubMed Central journal article supplement (PMC3096687)

**Figure S6.** Determination of correction constant (f). The left panel shows the relationship between the technical correlation value and f. Correlation is best when  $f \geq 0.7$ . The right panel displays the correlation between transformed data using correction constant L and the raw spectral count data after protein length normalization.

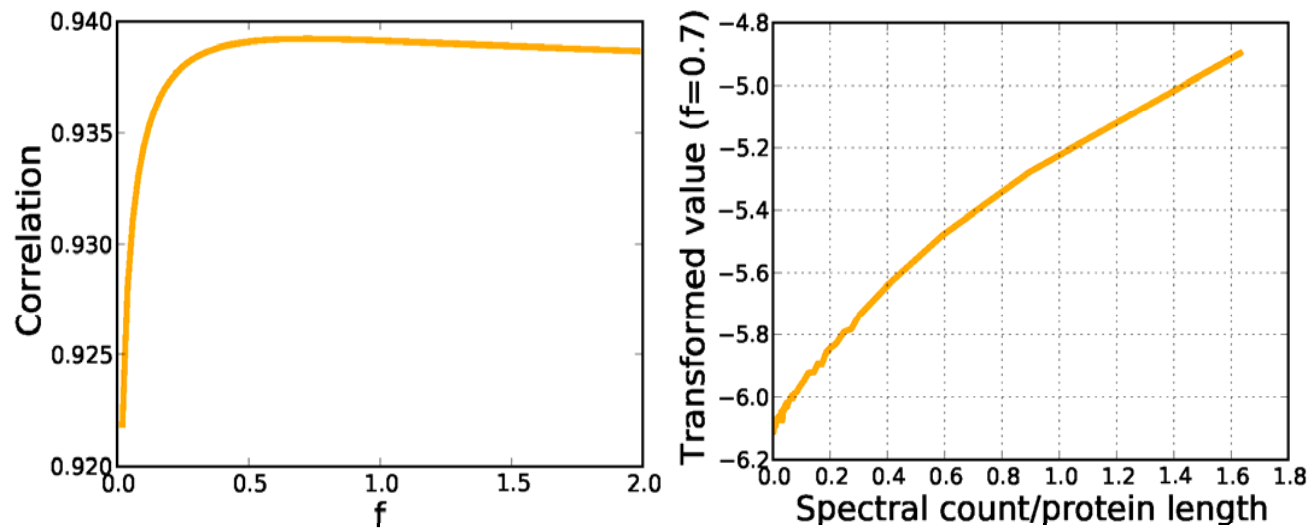

Supplement: NIHMS285254-supplement-6.pdf [file NIHMS285254-supplement-6.pdf]
