# Supplementary material
Source: PubMed Central journal article supplement (PMC3096687)

Figure S1

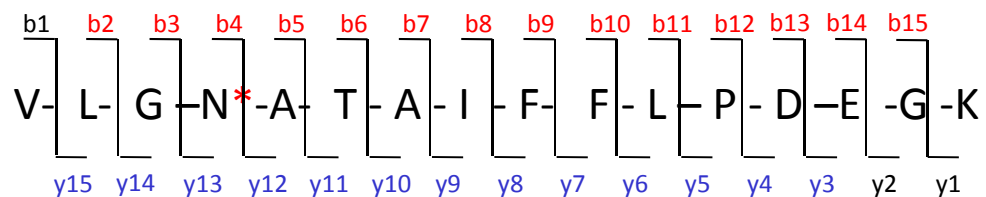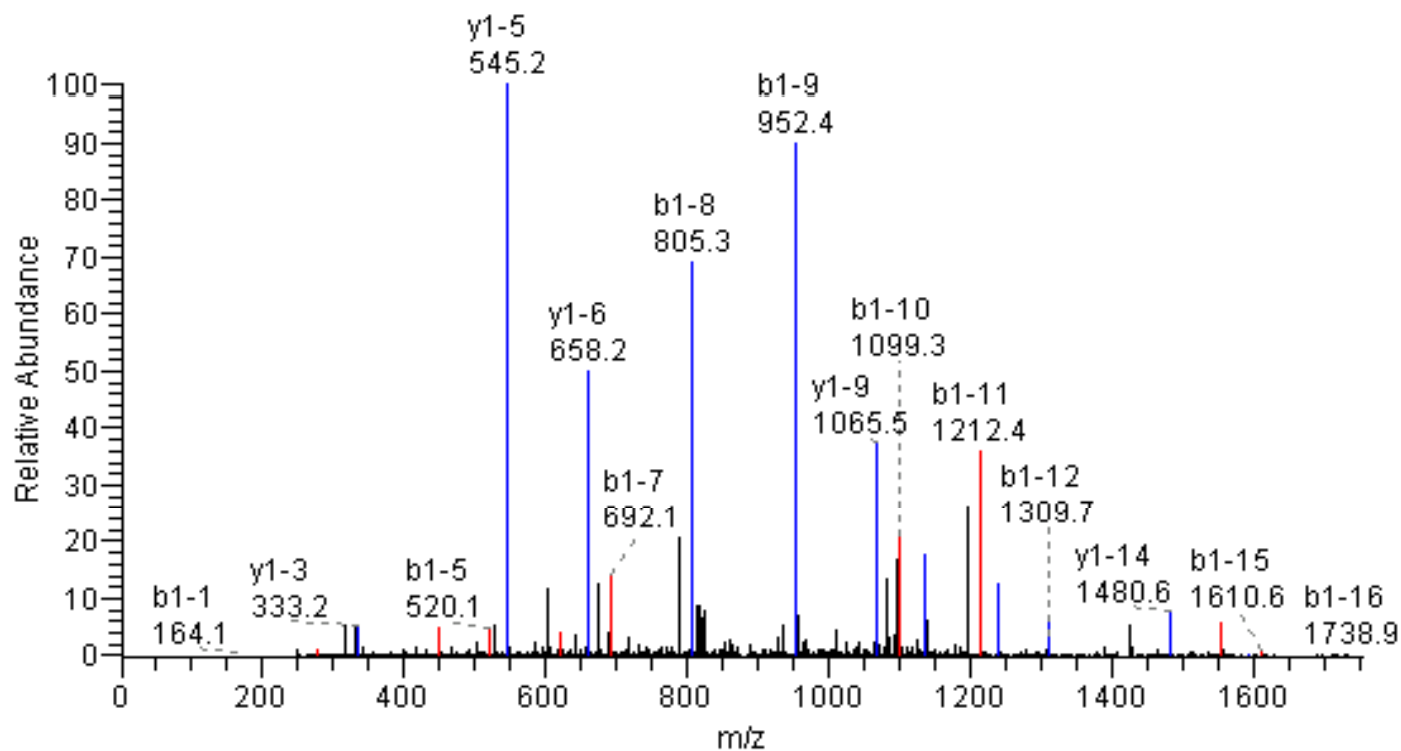

Supplement: NIHMS285254-supplement-1.pdf [file NIHMS285254-supplement-1.pdf]
